# Supplementary material for: Validation of Real-World Case Definitions for COVID-19 Diagnosis and Severe COVID-19 Illness Among Patients Infected with SARS-CoV-2: Translation of Clinical Trial Definitions to Real-World Settings
Source: bioRxiv or medRxiv preprint supplement (doi:10.1101/2023.09.12.23295441), 2023-09-12
Supplement: Supplementary file [file media-1.pdf]

## Supplementary Materials

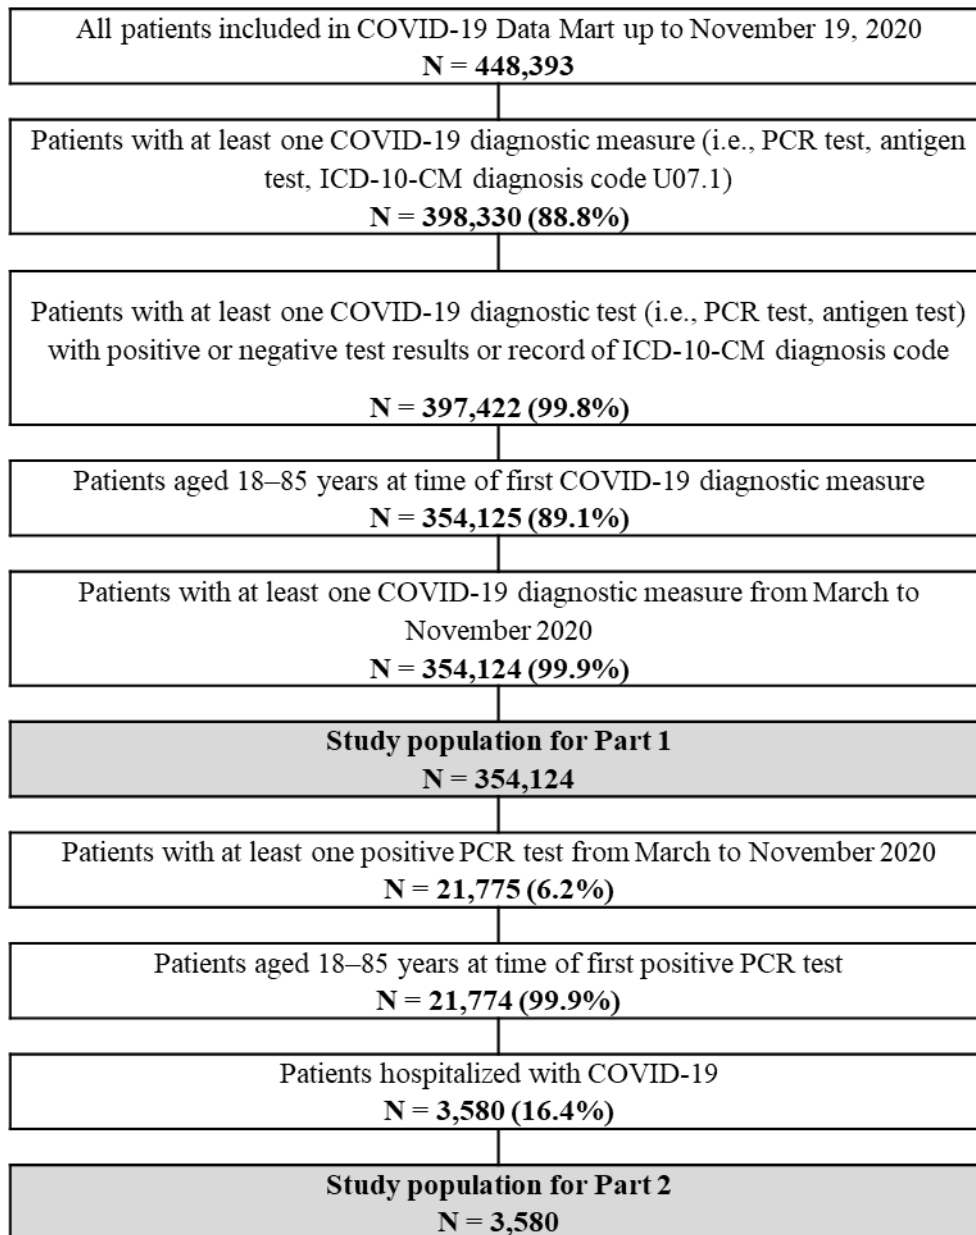

**Figure S1.** Flow diagram of patient enrollment.

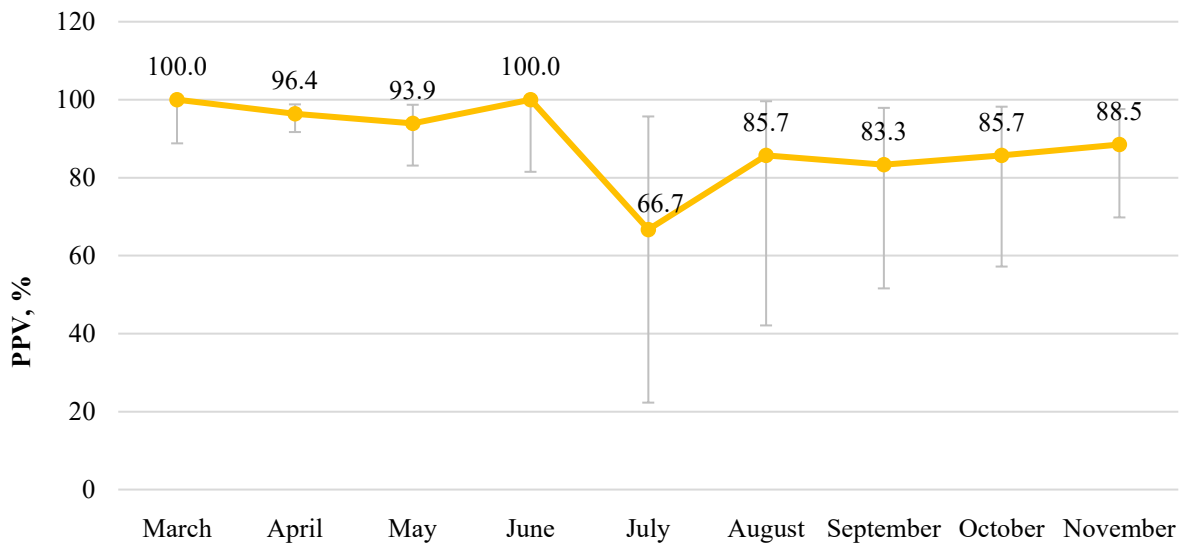

|                  | Month in 2020 |              |              |               |              |              |              |              |              |  |
|------------------|---------------|--------------|--------------|---------------|--------------|--------------|--------------|--------------|--------------|--|
| <b>TP</b>        | 31            | 132          | 46           | 18            | 4            | 6            | 10           | 12           | 23           |  |
| <b>TP + FP</b>   | 31            | 137          | 49           | 18            | 6            | 7            | 12           | 14           | 26           |  |
| <b>PPV, %</b>    | 100.0         | 96.4         | 93.9         | 100.0         | 66.7         | 85.7         | 83.3         | 85.7         | 88.5         |  |
| <b>95% CI, %</b> | (88.8, 100.0) | (91.7, 98.8) | (83.1, 98.7) | (81.5, 100.0) | (22.3, 95.7) | (42.1, 99.6) | (51.6, 97.9) | (57.2, 98.2) | (69.8, 97.6) |  |

**Figure S2.** PPV of severe COVID-19 against medical chart review by month. A total of 300 patients who met the Pfizer/BioNTech COVID-19 vaccine trial definition of severe COVID-19 illness was selected by random sampling without replacement. Data for November were available only up to November 19, 2020.

**Table S1.** COVID-19 diagnostic measures

| Diagnostic measure                                        | Overall<br>(March–November <sup>†</sup> 2020)<br>N = 354,124 |
|-----------------------------------------------------------|--------------------------------------------------------------|
| <b>PCR</b>                                                |                                                              |
| Patients with ≥1 PCR test, n (%)                          | 335,043 (94.6)                                               |
| Patients with ≥1 positive test                            | 21,775 (6.5)                                                 |
| Patients without any positive tests                       | 313,268 (93.5)                                               |
| Patients with ≥1 negative test                            | 323,031 (96.4)                                               |
| Number of PCR tests per patient, mean ± SD [median]       | 2.2 ± 1.7 [2.0]                                              |
| Total number of PCR tests                                 | 726,652                                                      |
| Positive, n (%)                                           | 42,930 (5.9)                                                 |
| Negative, n (%)                                           | 683,722 (94.1)                                               |
| <b>ICD-10-CM diagnosis code (U07.1)<sup>‡</sup></b>       |                                                              |
| Patients with ≥1 ICD-10-CM diagnosis code (U07.1), n (%)  | 39,576 (11.2)                                                |
| Number of ICD-10-CM codes per patient, mean ± SD [median] | 3.0 ± 5.4 [2.0]                                              |

Data are shown as n (%) unless otherwise indicated.

<sup>†</sup>Data for November were available only up to November 19, 2020.

<sup>‡</sup>Defined as “COVID-19, virus identified”, effective April 1, 2020.

Abbreviations: COVID-19, coronavirus disease 2019; ICD-10-CM, International Classification of Diseases 10th Revision, Clinical Modification; PCR, polymerase chain reaction; SD, standard deviation.

**Table S2.** Frequency of severe or critical COVID-19 illness endpoints per WHO definition in patients hospitalized with COVID-19

| Endpoint                                                                               | All patients hospitalized<br>with COVID-19<br>N = 3,580 |
|----------------------------------------------------------------------------------------|---------------------------------------------------------|
| <b>Patients meeting WHO definition of severe or critical COVID-19 illness, n (%)</b>   | <b>2,822 (78.8)</b>                                     |
| <b>Patients meeting WHO definition of severe COVID-19 illness<sup>†</sup>, n (%)</b>   | <b>2,697 (75.3)</b>                                     |
| SpO <sub>2</sub> <sup>‡</sup>                                                          |                                                         |
| Patients with SpO <sub>2</sub> available                                               | 3,578 (99.9)                                            |
| SpO <sub>2</sub> <90%                                                                  | 1,931 (54.0)                                            |
| Respiratory frequency <sup>‡</sup>                                                     |                                                         |
| Patients with respiratory frequency available                                          | 3,573 (99.8)                                            |
| Respiratory frequency >30 breaths/min                                                  | 1,626 (45.5)                                            |
| Signs of severe respiratory distress <sup>¶</sup>                                      | 1,705 (47.6)                                            |
| <b>Patients meeting WHO definition of critical COVID-19 illness<sup>§</sup>, n (%)</b> | <b>1,454 (40.6)</b>                                     |
| Requiring life-sustaining treatment                                                    | 994 (27.8)                                              |
| Vasopressors <sup>¶</sup>                                                              | 914 (25.5)                                              |
| Invasive ventilation <sup>#</sup>                                                      | 738 (20.6)                                              |
| Noninvasive ventilation <sup>#</sup>                                                   | 605 (16.9)                                              |
| Acute respiratory distress syndrome <sup>¶</sup>                                       | 1,167 (32.6)                                            |
| Sepsis <sup>¶</sup>                                                                    | 494 (13.8)                                              |
| Septic shock <sup>¶</sup>                                                              | 334 (9.3)                                               |

<sup>†</sup>Patients meeting the WHO definition of severe COVID-19 illness had at least one of the listed endpoints during hospitalization with COVID-19.

<sup>‡</sup>If a patient had multiple measurements on the same day, the most severe result was used.

<sup>¶</sup>Identified using diagnosis codes.

<sup>§</sup>Patients meeting the WHO definition of critical COVID-19 illness had at least one of the listed endpoints during hospitalization with COVID-19.

<sup>¶</sup>Identified through string searches of medication names including dopamine, dobutamine, milrinone, levosimendan, epinephrine, norepinephrine, vasopressin, and phenylephrine.

<sup>#</sup>Identified from structured procedure data based on procedure codes and from respiratory therapy-related procedure data curated by Mass General Brigham.

Abbreviations: COVID-19, coronavirus disease 2019; SpO<sub>2</sub>, oxygen saturation; WHO, World Health Organization.

**Table S3.** Validation of severe or critical COVID-19 illness endpoints per WHO definition against medical chart review

| Endpoint                                                                         | PPV <sup>†‡</sup> |            |                             |
|----------------------------------------------------------------------------------|-------------------|------------|-----------------------------|
|                                                                                  | TP                | TP + FP    | PPV % (95% CI) <sup>¶</sup> |
| <b>Patients meeting WHO definition of severe or critical COVID-19 illness</b>    | <b>190</b>        | <b>244</b> | <b>77.9 (72.1, 82.9)</b>    |
| <b>Patients meeting WHO definition of severe COVID-19 illness<sup>§</sup></b>    | <b>186</b>        | <b>237</b> | <b>78.5 (72.7, 83.5)</b>    |
| SpO <sub>2</sub> <90% <sup>  </sup>                                              | 157               | 172        | 91.3 (86.0, 95.0)           |
| Respiratory frequency >30 breaths/min                                            | 127               | 136        | 93.4 (87.8, 96.9)           |
| Signs of severe respiratory distress <sup>#</sup>                                | 111               | 149        | 74.5 (66.7, 81.3)           |
| <b>Patients meeting WHO definition of critical COVID-19 illness<sup>††</sup></b> | <b>108</b>        | <b>119</b> | <b>90.8 (84.1, 95.3)</b>    |
| Requiring life-sustaining treatment                                              | 79                | 85         | 92.9 (85.3, 97.4)           |
| Vasopressors <sup>‡‡</sup>                                                       | 76                | 81         | 93.8 (86.2, 98.0)           |
| Invasive ventilation <sup>¶¶</sup>                                               | 64                | 66         | 97.0 (89.5, 99.6)           |
| Noninvasive ventilation <sup>¶¶</sup>                                            | 48                | 49         | 98.0 (89.1, 99.9)           |
| Acute respiratory distress syndrome <sup>#</sup>                                 | 95                | 102        | 93.1 (86.4, 97.2)           |
| Sepsis <sup>#</sup>                                                              | 51                | 52         | 98.1 (89.7, 100.0)          |
| Septic shock <sup>#</sup>                                                        | 37                | 38         | 97.4 (86.2, 99.9)           |

<sup>†</sup>Validation was conducted in a subset of the 300 patients who met the WHO definition of severe or critical COVID-19 illness based on codified data.

<sup>‡</sup>PPV was calculated as TP/ (TP + FP), where TP and FP were patients meeting the WHO definition of severe COVID-19 illness by medical chart review and those with the corresponding endpoint determined from codified data, respectively.

<sup>¶</sup>Exact CIs are presented for each validation measure.

<sup>§</sup>Patients who met the WHO definition of severe COVID-19 illness had at least one of the listed endpoints during hospitalization with COVID-19.

<sup>||</sup>Endpoints were identified from clinical sign-related or laboratory data curated by Mass General Brigham.

<sup>#</sup>Identified from structured diagnosis data based on diagnosis codes.

<sup>††</sup>Patients who met the WHO definition of critical COVID-19 illness had at least one of the listed endpoints during hospitalization with COVID-19.

<sup>‡‡</sup>Identified through string searches of medication names including dopamine, epinephrine, norepinephrine, and vasopressin.

<sup>¶¶</sup>Identified from structured procedure data based on procedure codes and from respiratory therapy-related procedure data curated by Mass General Brigham.

Abbreviations: CI, confidence interval; COVID-19, coronavirus disease 2019; FP, false positive; PPV, positive predictive value; SpO<sub>2</sub>, oxygen saturation; TP, true positive; WHO, World Health Organization.

**Table S4.** Validation of non-severe COVID-19 illness in codified data against medical chart review

| Endpoint                                                                              | NPV <sup>†‡</sup> |         |                             |
|---------------------------------------------------------------------------------------|-------------------|---------|-----------------------------|
|                                                                                       | TN                | TN + FN | NPV % (95% CI) <sup>¶</sup> |
| Patients not meeting vaccine trial definition of severe COVID-19 illness <sup>§</sup> | 75                | 100     | 75.0 (65.3, 83.1)           |
| Patients not meeting WHO definition of severe or critical COVID-19 illness            | 66                | 72      | 91.7 (82.7, 96.9)           |

<sup>†</sup>NPV was calculated based on a subgroup of 100 patients who did not meet the Pfizer/BioNTech COVID-19 vaccine trial definition of severe COVID-19 illness based on codified data.

<sup>‡</sup>NPV was calculated as  $TN / (TN + FN)$ , where TN and FN were patients who did not meet the definition of severe COVID-19 illness based on chart review and codified data, respectively.

<sup>¶</sup>Exact CIs are presented for each validation measure.

<sup>§</sup>Patients with hospitalizations that were determined to not be COVID-19–related through chart review were categorized as TN.

Abbreviations: CI, confidence interval; COVID-19, coronavirus disease 2019; FN, false negative; NPV, negative predictive value; TN, true negative; WHO, World Health Organization.
